# Supplementary material
Source: publisher figshare collection journal article supplement (https://tandf.figshare.com/articles/dataset/_/19585934)
Supplement: Supplementary file 1 [file 34791791]

## SUPPLEMENTARY DATA

1  
2  
3  
4 **Fatigue is a systemic extraintestinal disease manifestation largely independent of disease activity, chronicity, and nutritional**  
5  
6 **deficiencies in inflammatory bowel disease**  
7  
8  
9  
10  
11  
12

13  
14 Katrine Risager Christensen<sup>1,2</sup>, Mark Andrew Ainsworth<sup>3</sup>, Casper Steenholdt<sup>1</sup>, Sine Buhl<sup>1</sup>, Marie Skougaard<sup>2</sup>, Jørn Brynskov<sup>1</sup>, Tanja  
15  
16 Schjødt Jørgensen<sup>2</sup>, Lars Erik Kristensen<sup>2</sup>  
17  
18  
19  
20

21 <sup>1</sup>Dept. Of Gastroenterology, Copenhagen University Hospital–Herlev and Gentofte, Copenhagen, Denmark  
22

23 <sup>2</sup>The Parker Institute, Copenhagen University Hospital–Bispebjerg and Frederiksberg, Copenhagen, Denmark  
24  
25

26 <sup>3</sup>Dept. of Gastroenterology, Odense University Hospital, Odense, Denmark  
27  
28  
29  
30  
31  
32  
33  
34  
35  
36  
37  
38  
39  
40  
41  
42  
43  
44  
45  
46  
47  
48  
49  
50  
51  
52  
53  
54  
55  
56  
57  
58  
59  
60

## SUPPLEMENTARY DATA

**Table S1: Missing data for each variable**

| Variables                                    | Missing data, total (%) |
|----------------------------------------------|-------------------------|
| Female                                       | 0                       |
| Age                                          | 0                       |
| Disease                                      | 0                       |
| Disease duration                             | 1.6                     |
| Type of biologic therapy                     | 0                       |
| Treatment duration of biologic therapy       | 0.4                     |
| Number of previous biologic therapies        | 1.6                     |
| Concomitant immunomodulators                 | 7                       |
| Number of systemic corticosteroid treatments | 14.4                    |
| Disease activity (self-reported)             | 0.7                     |
| Previous use of thiopurine                   | 2.7                     |
| Body mass index                              | 11.7                    |
| Other (chronic) diseases                     | 0                       |
| Surgery                                      | 1.34                    |
| C-reactive protein                           | 11                      |
| Hemoglobin                                   | 11.7                    |
| Vitamin B12                                  | 14                      |
| Vitamin D                                    | 20.7                    |
| Iron                                         | 14.7                    |
| Ferritin                                     | 14.3                    |
| Fecal calprotectin                           | 49                      |
| Endoscopy                                    | 72                      |
| Magnetic Resonance Imaging                   | 48                      |
| Smoking                                      | 2                       |
| Fatigue on visual analogue scale             | 5                       |
| Short health scale VAS (0–10)                | 0                       |
| S-IBDQ <sup>a</sup>                          | 0.7                     |
| EQ-5D-5L                                     | 1.7                     |

## SUPPLEMENTARY DATA

**Figure S1: Primary principal component analysis, scree plot**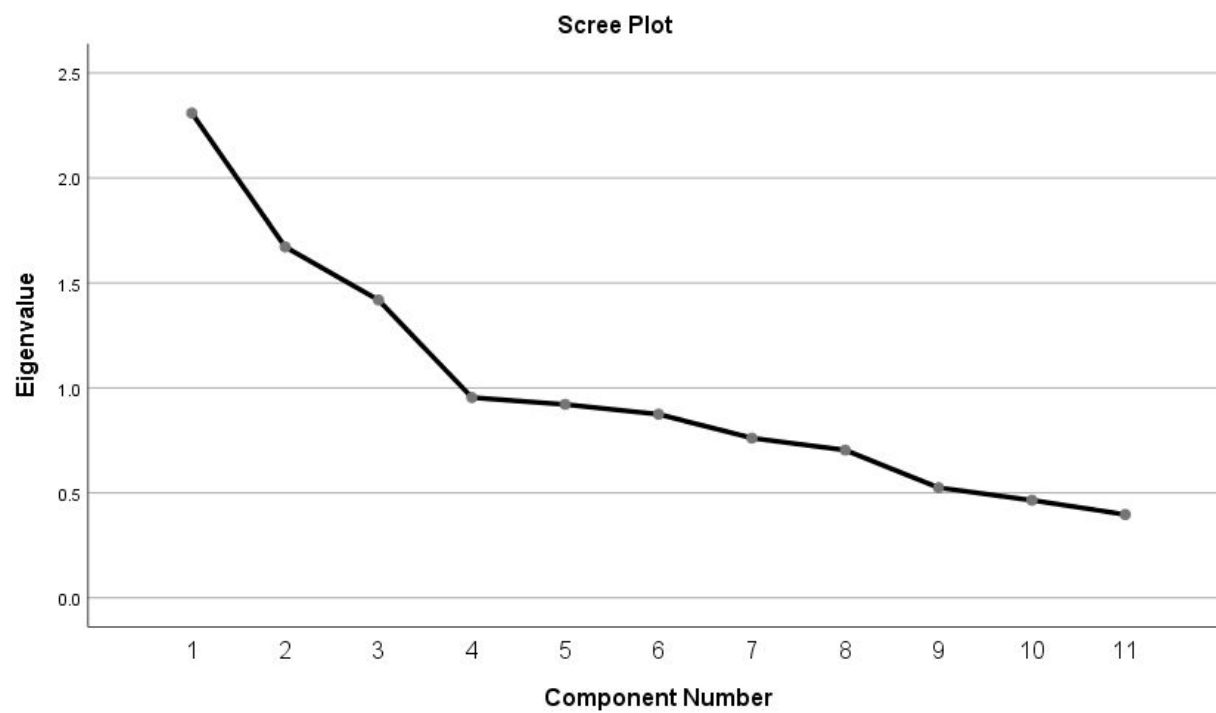

Figure 1: Three components with eigenvalue &gt;1 were identified.

## SUPPLEMENTARY DATA

**Table SII: Total Variance Explained primary principal component analysis**

| Component | Initial Eigenvalues |               |              | Extraction Sums of Squared Loadings |               |              | Rotation Sums of Squared Loadings |               |              |
|-----------|---------------------|---------------|--------------|-------------------------------------|---------------|--------------|-----------------------------------|---------------|--------------|
|           | Total               | % of Variance | Cumulative % | Total                               | % of Variance | Cumulative % | Total                             | % of Variance | Cumulative % |
| 1         | 2.309               | 20.989        | 20.989       | 2.309                               | 20.989        | 20.989       | 2.287                             | 20.791        | 20.791       |
| 2         | 1.672               | 15.196        | 36.185       | 1.672                               | 15.196        | 36.185       | 1.588                             | 14.436        | 35.227       |
| 3         | 1.418               | 12.895        | 49.081       | 1.418                               | 12.895        | 49.081       | 1.524                             | 13.854        | 49.081       |
| 4         | .954                | 8.675         | 57.756       |                                     |               |              |                                   |               |              |
| 5         | .921                | 8.375         | 66.131       |                                     |               |              |                                   |               |              |
| 6         | .874                | 7.950         | 74.081       |                                     |               |              |                                   |               |              |
| 7         | .761                | 6.919         | 80.999       |                                     |               |              |                                   |               |              |
| 8         | .704                | 6.398         | 87.397       |                                     |               |              |                                   |               |              |
| 9         | .525                | 4.770         | 92.168       |                                     |               |              |                                   |               |              |
| 10        | .465                | 4.225         | 96.392       |                                     |               |              |                                   |               |              |
| 11        | .397                | 3.608         | 100.000      |                                     |               |              |                                   |               |              |

Extraction Method: Principal Component Analysis.

**Table SIII: Total Variance Explained – Crohn's disease**

| Component | Initial Eigenvalues |               |              | Extraction Sums of Squared Loadings |               |              | Rotation Sums of Squared Loadings |               |              |
|-----------|---------------------|---------------|--------------|-------------------------------------|---------------|--------------|-----------------------------------|---------------|--------------|
|           | Total               | % of Variance | Cumulative % | Total                               | % of Variance | Cumulative % | Total                             | % of Variance | Cumulative % |
| 1         | 2.593               | 23.571        | 23.571       | 2.593                               | 23.571        | 23.571       | 2.231                             | 20.279        | 20.279       |
| 2         | 1.713               | 15.571        | 39.142       | 1.713                               | 15.571        | 39.142       | 1.736                             | 15.778        | 36.057       |
| 3         | 1.238               | 11.254        | 50.396       | 1.238                               | 11.254        | 50.396       | 1.506                             | 13.694        | 49.751       |
| 4         | 1.032               | 9.385         | 59.781       | 1.032                               | 9.385         | 59.781       | 1.103                             | 10.030        | 59.781       |
| 5         | .936                | 8.512         | 68.293       |                                     |               |              |                                   |               |              |
| 6         | .821                | 7.466         | 75.759       |                                     |               |              |                                   |               |              |
| 7         | .758                | 6.895         | 82.654       |                                     |               |              |                                   |               |              |
| 8         | .632                | 5.743         | 88.397       |                                     |               |              |                                   |               |              |
| 9         | .512                | 4.652         | 93.049       |                                     |               |              |                                   |               |              |
| 10        | .455                | 4.137         | 97.187       |                                     |               |              |                                   |               |              |
| 11        | .309                | 2.813         | 100.000      |                                     |               |              |                                   |               |              |

## SUPPLEMENTARY DATA

Extraction Method: Principal Component Analysis.

**Table SIV: KMO and Bartlett's Test for Crohn's Disease**

|                                                  |                    |         |
|--------------------------------------------------|--------------------|---------|
| Kaiser-Meyer-Olkin Measure of Sampling Adequacy. |                    | .646    |
| Bartlett's Test of Sphericity                    | Approx. Chi-Square | 106.921 |
|                                                  | df                 | 55      |
|                                                  | Sig.               | .000    |

**Table SV: Rotated Component Matrix for Crohn's disease**

|                            | Component |       |       |       |
|----------------------------|-----------|-------|-------|-------|
|                            | 1         | 2     | 3     | 4     |
| duration_disease           | .846      | .212  | -.015 | .125  |
| surgery_total              | .708      | -.243 | .088  | .136  |
| age                        | .639      | .078  | -.131 | -.104 |
| biologic_previously_number | .612      | .395  | .103  | -.061 |
| dvit                       | -.157     | .758  | -.095 | -.201 |
| bvit                       | .408      | .632  | .082  | .015  |
| steroid_systemic_number    | .173      | .598  | -.042 | .253  |
| crp                        | -.077     | -.035 | .797  | .011  |
| Disease_activity_converted | .058      | .023  | .730  | -.029 |
| iron                       | -.006     | .258  | -.363 | .715  |
| Chronic_disease_no         | .037      | -.263 | .391  | .662  |

Extraction Method: Principal Component Analysis.

Rotation Method: Varimax with Kaiser Normalization.

a. disease = CD

b. Rotation converged in 7 iterations.

c. Only cases for which FACIT\_score <= 39 (FILTER) = Selected are used in the analysis phase.

## SUPPLEMENTARY DATA

**Figure S2: Sub-principal component analysis of Crohn's disease, scree plot**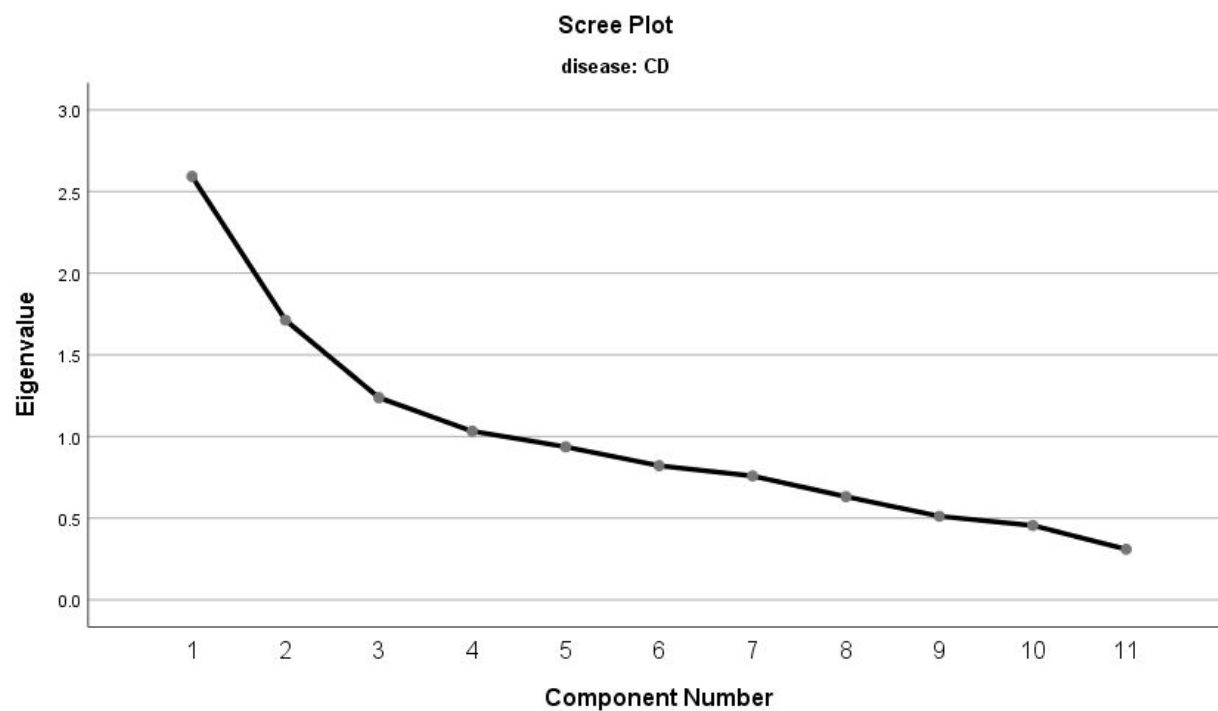**Table SVI: KMO and Bartlett's Test for PCA in ulcerative colitis**

|                                                  |                    |        |
|--------------------------------------------------|--------------------|--------|
| Kaiser-Meyer-Olkin Measure of Sampling Adequacy. |                    | .412   |
| Bartlett's Test of Sphericity                    | Approx. Chi-Square | 51.541 |
|                                                  | df                 | 55     |
|                                                  | Sig.               | .608   |

## SUPPLEMENTARY DATA

**Table SVII: Total Variance Explained for PCA in ulcerative colitis**

| Component | Initial Eigenvalues |               |              | Extraction Sums of Squared Loadings |               |              | Rotation Sums of Squared Loadings |               |              |
|-----------|---------------------|---------------|--------------|-------------------------------------|---------------|--------------|-----------------------------------|---------------|--------------|
|           | Total               | % of Variance | Cumulative % | Total                               | % of Variance | Cumulative % | Total                             | % of Variance | Cumulative % |
| 1         | 1.959               | 17.810        | 17.810       | 1.959                               | 17.810        | 17.810       | 1.747                             | 15.880        | 15.880       |
| 2         | 1.667               | 15.155        | 32.965       | 1.667                               | 15.155        | 32.965       | 1.636                             | 14.877        | 30.758       |
| 3         | 1.522               | 13.839        | 46.804       | 1.522                               | 13.839        | 46.804       | 1.414                             | 12.858        | 43.616       |
| 4         | 1.173               | 10.663        | 57.467       | 1.173                               | 10.663        | 57.467       | 1.372                             | 12.471        | 56.087       |
| 5         | 1.133               | 10.299        | 67.766       | 1.133                               | 10.299        | 67.766       | 1.285                             | 11.679        | 67.766       |
| 6         | .978                | 8.892         | 76.658       |                                     |               |              |                                   |               |              |
| 7         | .845                | 7.686         | 84.344       |                                     |               |              |                                   |               |              |
| 8         | .546                | 4.968         | 89.312       |                                     |               |              |                                   |               |              |
| 9         | .529                | 4.809         | 94.121       |                                     |               |              |                                   |               |              |
| 10        | .409                | 3.720         | 97.841       |                                     |               |              |                                   |               |              |
| 11        | .237                | 2.159         | 100.000      |                                     |               |              |                                   |               |              |

Extraction Method: Principal Component Analysis (PCA)

**Table SVIII: Rotated Component Matrix for PCA in ulcerative colitis**

|                            | Component |       |       |       |       |
|----------------------------|-----------|-------|-------|-------|-------|
|                            | 1         | 2     | 3     | 4     | 5     |
| crp                        | .778      | -.175 | -.383 | .031  | .012  |
| iron                       | -.744     | .044  | -.134 | -.029 | .144  |
| duration_disease           | -.044     | .842  | .099  | -.010 | .083  |
| steroid_systemic_number    | -.224     | .711  | -.183 | .151  | -.125 |
| dvit                       | .317      | .454  | .143  | -.363 | .321  |
| bvit                       | .350      | .261  | -.754 | .084  | -.107 |
| Chronic_disease_no         | .134      | .121  | .715  | .146  | -.006 |
| surgery_total              | -.038     | .109  | .090  | .867  | .019  |
| Disease_activity_converted | .503      | -.066 | .040  | .652  | .279  |
| biologic_previously_number | .194      | .194  | .182  | -.096 | -.810 |
| age                        | .048      | .215  | .252  | .038  | .626  |

SUPPLEMENTARY DATA

1  
2  
3  
4  
5  
6  
7  
8  
9  
10  
11  
12  
13  
14  
15  
16  
17  
18  
19  
20  
21  
22  
23  
24  
25  
26  
27  
28  
29  
30  
31  
32  
33  
34  
35  
36  
37  
38  
39  
40  
41  
42  
43  
44  
45  
46  
47  
48  
49  
50  
51  
52  
53  
54  
55  
56  
57  
58  
59  
60

Extraction Method: Principal Component Analysis.  
Rotation Method: Varimax with Kaiser Normalization.

For Peer Review Only
